# Supplementary material for: Controlling the Polymorphic Outcome of 2,6-Dimethoxybenzoic Acid Crystallization Using Additives
Source: MDPI journal article supplement (doi:10.3390/cryst12081161), 2022-08-18
Supplement: s1 [file s1]

# Controlling the Polymorphic Outcome of 2,6-Dimethoxybenzoic Acid Crystallization Using Additives

Aina Semjonova \* and Agris Bērziņš

Faculty of Chemistry, University of Latvia, Jelgavas iela 1, LV-1004 Rīga, Latvia

\* Correspondence: aina.semjonova@lu.lv

**Table S1.** List of additives used in the study.

| Additive                                                     | Purity/Characteristics  | Supplier       |
|--------------------------------------------------------------|-------------------------|----------------|
| Microcrystalline cellulose (MCC)                             | Avicel PH-101           | Sigma          |
| Sodium carboxymethyl cellulose (Na CMC)                      | M.W. 250,000 (DS = 1.2) | Acros          |
| Polyvinyl chloride (PVC)                                     | M.W. 43,000             | Sigma-Aldrich  |
| Polycaprolactone (PCL)                                       | M.W. 14,000             | Sigma          |
| Glycine                                                      | 99%                     | Acros          |
| 2,2-Bis(hydroxymethyl)-2,2',2''-nitrilotriethanol (BIS-TRIS) | 99%                     | Fluorochem     |
| 4-carboxybenzeneboronic acid (4-COOHPhBorA)                  | 98%                     | Fluorochem     |
| Phenylboronic acid (PhBorA)                                  | 98%                     | Fluorochem     |
| NH <sub>4</sub> Cl                                           | 99%                     | Acros          |
| Polysorbate 80                                               | ≤4.0% H <sub>2</sub> O  | Alfa           |
| Tween 20 (polysorbate 20)                                    | ≤3.0% H <sub>2</sub> O  | Sigma          |
| Sorbitan monolaurate (Span 20)                               | ≤1.0% H <sub>2</sub> O  | Merck          |
| n-octyl-β-D-glucopyranoside (OGP)                            | >99%                    | Fluorochem     |
| Poly(acrylic acid) (PAS)                                     | 25 wt% soln. in water   | Alfa           |
| Poly(acrylic amide) (PAA)                                    | M.W. 5 to 6,000,000     | Acros          |
| 4-iodophenylboronic acid (4-IPhBorA)                         | 98%                     | Fluorochem     |
| Cellulose acetate (CA)                                       | M.W. 100,000            | Acros          |
| Hydroxypropylmethyl cellulose                                | n.a.                    | Pharmacoat 606 |

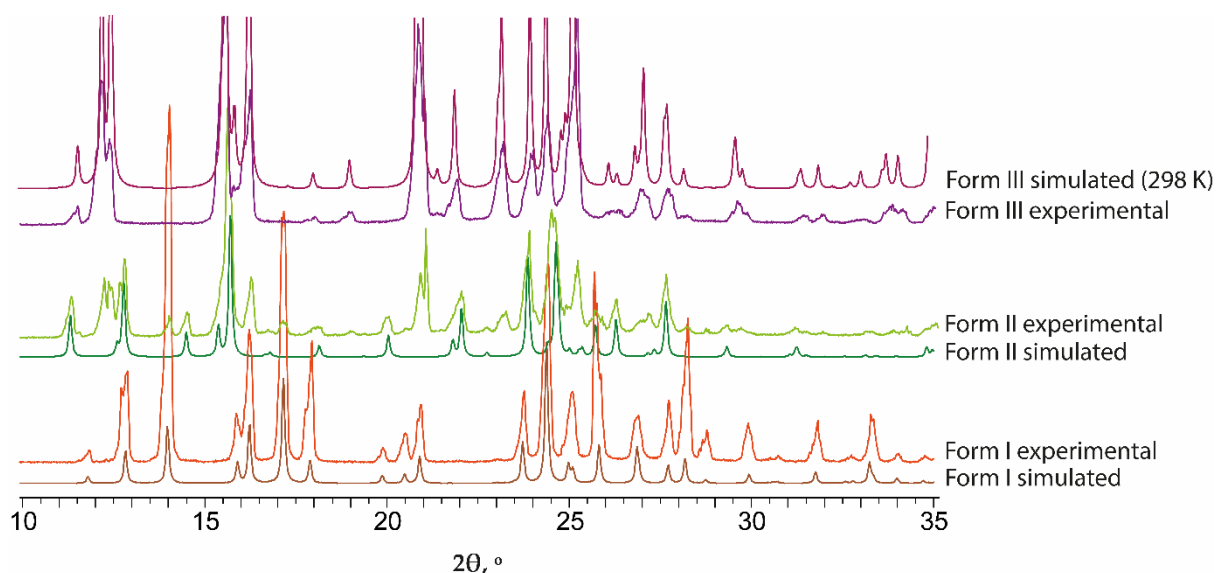

**Figure S1.** Phase identification of 2,6MeOBA polymorphs using PXRD patterns simulated from crystal structures deposited in the CSD. The experimental PXRD pattern of form II has form I and III impurities.

**Table S2.** Experimental solubility data for form I in water and coefficients a and b found in the fitting using the least-squares approach.

| $T_{\text{exp}}, ^\circ\text{C}$ | $S_{\text{exp}}, \text{mg mL}^{-1}$ | $\ln S_{\text{exp}}$ | $1/T_{\text{exp}}$ |
|----------------------------------|-------------------------------------|----------------------|--------------------|
| 18.8                             | 3.0                                 | 1.11                 | 0.00343            |
| 30.8                             | 4.4                                 | 1.48                 | 0.00329            |
| 34.7                             | 6.3                                 | 1.83                 | 0.00325            |
| 46.7                             | 8.9                                 | 2.18                 | 0.00313            |
| 53.6                             | 9.9                                 | 2.30                 | 0.00306            |
| 60.3                             | 14.2                                | 2.65                 | 0.00300            |
| 64.5                             | 18.0                                | 2.89                 | 0.00296            |
| 69.4                             | 22.1                                | 3.10                 | 0.00292            |
| 74.7                             | 23.5                                | 3.16                 | 0.00288            |
| 76.6                             | 27.3                                | 3.31                 | 0.00286            |
| 81.8                             | 31.0                                | 3.43                 | 0.00282            |
| 83.5                             | 35.7                                | 3.57                 | 0.00281            |
|                                  |                                     | a                    | $-3960 \pm 130$    |
|                                  |                                     | b                    | $15 \pm 0.4$       |
|                                  |                                     | $R^2$                | 0.9894             |
|                                  |                                     | $SE_{\ln S}$         | 0.09               |

**Table S3.** Experimental solubility data for form III in water and coefficients a and b of Equation (1) found in the fitting using the least-squares approach.

| $T_{\text{exp}}, \text{ }^{\circ}\text{C}$ | $S_{\text{exp}}, \text{ mg mL}^{-1}$ | $\ln S_{\text{exp}}$ | $1/T_{\text{exp}}$ |
|--------------------------------------------|--------------------------------------|----------------------|--------------------|
| 11.6                                       | 3.1                                  | 1.13                 | 0.00351            |
| 21.1                                       | 4.3                                  | 1.46                 | 0.00340            |
| 33.0                                       | 6.3                                  | 1.84                 | 0.00327            |
| 43.1                                       | 8.0                                  | 2.08                 | 0.00316            |
| 56.0                                       | 14.0                                 | 2.64                 | 0.00304            |
| 61.3                                       | 17.9                                 | 2.89                 | 0.00299            |
| 66.7                                       | 22.1                                 | 3.10                 | 0.00294            |
| 72.7                                       | 23.5                                 | 3.16                 | 0.00289            |
| 75.3                                       | 27.8                                 | 3.33                 | 0.00287            |
| 82.4                                       | 29.2                                 | 3.37                 | 0.00281            |
| 85.0                                       | 33.6                                 | 3.51                 | 0.00279            |
|                                            |                                      | a                    | $-3400 \pm 110$    |
|                                            |                                      | b                    | $13 \pm 0.3$       |
|                                            |                                      | $R^2$                | 0.9909             |
|                                            |                                      | $SE_{\ln S}$         | 0.08               |

**Table S4.** Detailed results from the crystallization of pure solvents and quantification results of mixtures from the Rietveld refinement. The Rietveld refinements here and in further experiments were performed on PXRD patterns of unground samples measured without any optimization for quantitative phase analysis, therefore, the Rwp values are rather high because of the preferred orientation or presence of additive peaks in the PXRD patterns (in preliminary crystallization with additives).

| Solvent                 | Cooling                       | Evaporation                   |                                           |                                |
|-------------------------|-------------------------------|-------------------------------|-------------------------------------------|--------------------------------|
|                         |                               | 5 $^{\circ}\text{C}$          | 25 $^{\circ}\text{C}$                     | 50 $^{\circ}\text{C}$          |
| 1,4-Dioxane             | I + III↓<br>95:5 (Rwp 12.14%) | III                           | III / I + III<br>58:42 (Rwp 12.47%)       | III                            |
| Methanol                | I + III↓<br>98:2 (Rwp 20.09%) | I                             | I / III + I↓ + II<br>50:1:49 (Rwp 11.33%) | I                              |
| Acetone                 | I                             | I + III<br>72:28 (Rwp 19.05%) | I                                         | III                            |
| Tetrahydrofuran         | I                             | I + III<br>77:23 (Rwp 14.19%) | I + III<br>77:23 (Rwp 14.12%)             | I↓ + III<br>10:90 (Rwp 11.66%) |
| Isopropanol             | I                             | I                             | I / I + III↓<br>98:2 (Rwp 12.79%)         | III                            |
| Acetonitrile            | I                             | I + III↓<br>94:6 (Rwp 7.03%)  | III / I + III<br>67:33 (Rwp 12.63%)       | I / III                        |
| Butan-2-one             | I + III↓<br>97:3 (Rwp 12.40%) | III                           | III                                       | I                              |
| 4-Methyl-2-pentanone    | I                             | I                             | I + III↓<br>96:4 (Rwp 11.67%)             | I + III<br>25:75 (Rwp 10.07%)  |
| Methyl acetate          | I                             | I + III↓<br>91:9 (Rwp 7.60%)  | I + III<br>14:86 (Rwp 10.70%)             | I↓ + III<br>6:94 (Rwp 15.45%)  |
| Tert-butyl methyl ether | I                             | I                             | I                                         | I + III<br>59:41 (Rwp 7.07%)   |
| Water                   | I                             | I                             | I                                         | I                              |
| Toluene                 | I                             | N/A                           | I + III<br>67:33 (Rwp 21.07%) *           | N/A                            |
| Chloroform              | I                             | N/A                           | I + III↓<br>92:8 (Rwp 38.47%) *           | N/A                            |

|                 |                                 |     |                                 |     |
|-----------------|---------------------------------|-----|---------------------------------|-----|
| Dichloromethane | I + III↓<br>93:7 (Rwp 30.67%) * | N/A | I + III↓<br>96:4 (Rwp 22.25%) * | N/A |
| Ethyl acetate   | I                               | N/A | I                               | N/A |
| Formic acid     | I                               | N/A | I                               | N/A |
| Nitromethane    | I                               | N/A | I                               | N/A |

↓—low concentration, N/A—crystallization was not performed. \*—high Rwp values due to low crystallization outcome and rough PXRD patterns.

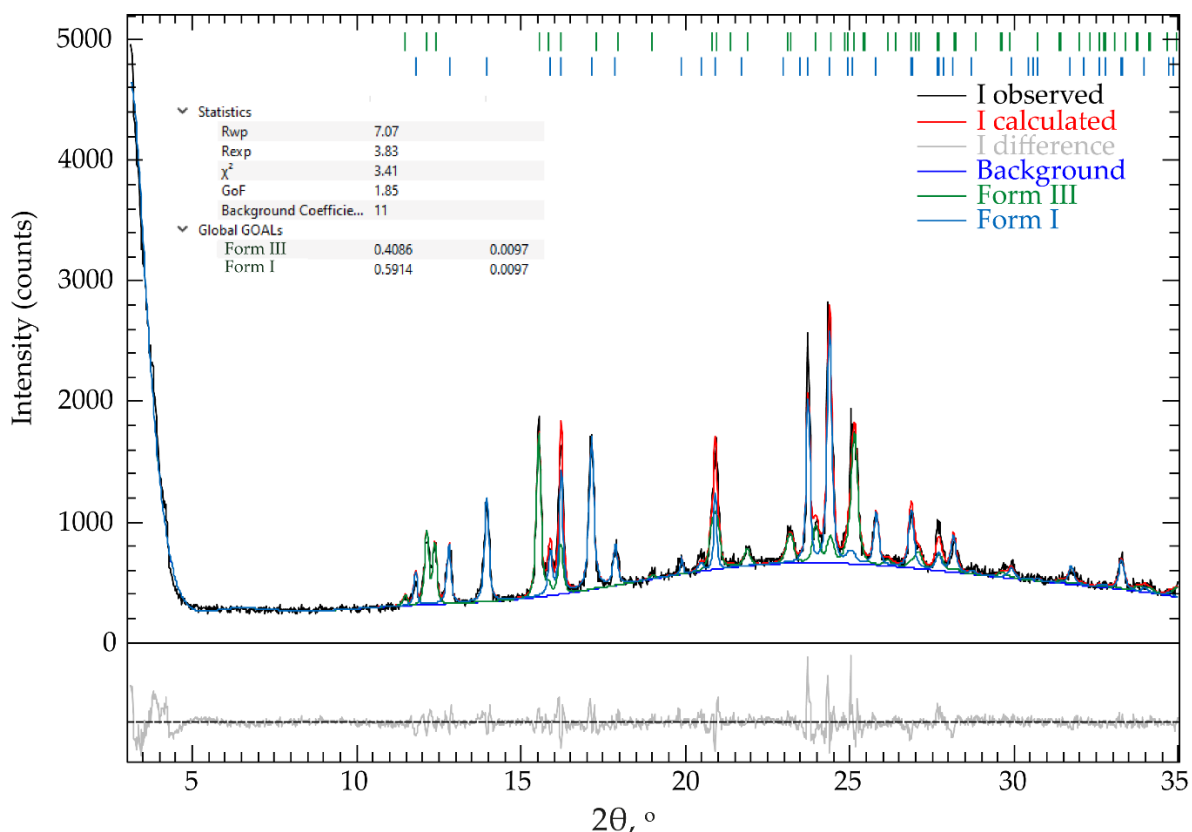

**Figure S2.** Example of Rietveld refinement from Profex 4.3.6. with the obtained Rietveld R-factors and phase composition. The refinement was carried out on the sample obtained in crystallization from tert-butyl methyl ether with evaporation at 50 °C.

**Table S5.** Detailed results from the crystallization with additive presence and quantification results of mixtures from the Rietveld refinement.

| Solvent | Additive | Number of Vial                |                               |                               |
|---------|----------|-------------------------------|-------------------------------|-------------------------------|
|         |          | 1.                            | 2.                            | 3.                            |
| THF     | Blank    | I + III<br>36:64 (Rwp 10.29%) | I + III<br>30:70 (Rwp 15.15%) | I + III<br>53:47 (Rwp 14.36%) |
|         | PVC      | I + III<br>85:15 (Rwp 7.31%)  | I + III<br>25:75 (Rwp 5.41%)  | I + III<br>41:59 (Rwp 6.53%)  |
|         | Poly 80  | I + III<br>15:85 (Rwp 20.71%) | III                           | III                           |
|         | Span 20  | I + III<br>44:56 (Rwp 35.90%) | I + III<br>53:47 (Rwp 43.82%) | I                             |
|         | OGP      | I + III<br>88:12 (Rwp 17.82%) | I + III<br>6:94 (Rwp 21.77%)  | III                           |
|         | Tween 20 | I                             | I                             | I                             |
|         | PCL      | I + III<br>84:16 (Rwp 23.30%) | I + III<br>67:33 (Rwp 30.95%) | I                             |

|       |                    |                               |                               |                                       |
|-------|--------------------|-------------------------------|-------------------------------|---------------------------------------|
| MeCN  | PEG                | I + III<br>77:23 (Rwp 36.67%) | III                           | III                                   |
|       | Blank              | III                           | III                           | III                                   |
|       | PVC                | I + III<br>20:80 (Rwp 17.97%) | I                             | I                                     |
|       | Poly 80            | III                           | III                           | I + III<br>27:73 (Rwp 12.81%)         |
|       | Span 20            | III                           | III                           | I                                     |
|       | OGP                | I + III<br>18:82 (Rwp 14.34%) | I + III<br>31:69 (Rwp 16.50%) | I + III<br>34:66 (Rwp 20.50%)         |
|       | Tween 20           | I + III<br>80:20 (Rwp 10.30%) | I + III<br>55:45 (Rwp 15.47%) | I                                     |
|       | PCL                | III                           | III                           | I + III<br>36:64 (Rwp 22.70%)         |
|       | PEG                | I + III<br>93:7 (Rwp 34.64%)  | I + III<br>3:97 (Rwp 19.96%)  | I + III<br>84:16 (Rwp 29.39%)         |
| Water | Blank              | I + III<br>83:17 (Rwp 9.07%)  | I + III<br>94:6 (Rwp 13.88%)  | I + III<br>37:63 (Rwp 10.84%)         |
|       | Poly 80            | I + III<br>88:12 (Rwp 14.07%) | I                             | I                                     |
|       | PheBorA            | I + III<br>97:3 (Rwp 9.57%)   | I + III<br>92:8 (Rwp 8.67%)   | I + III<br>90:10 (Rwp 12.24%)         |
|       | 2,6MeOPheBorA      | I + III<br>13:87 (Rwp 6.97%)  | I + III<br>3:97 (Rwp 8.49%)   | I + III<br>19:81 (Rwp 7.61%)          |
|       | OGP                | I                             | I                             | I + II + III<br>20:14:66 (Rwp 32.18%) |
|       | PEG                | III                           | III                           | I + II + III<br>81:9:10 (Rwp 8.14%)   |
|       | HPC                | III                           | III                           | III                                   |
|       | PAA                | I                             | I                             | I + III<br>39:61 (Rwp 15.97%)         |
|       | 4IPheBorA          | I                             | I                             | I + III<br>95:5 (Rwp 23.48%)          |
|       | NH <sub>4</sub> Cl | I + III<br>94:6 (Rwp 15.71%)  | I + III<br>54:46 (Rwp 13.84%) | I + III<br>87:13 (Rwp 15.76%)         |
|       | Glycine            | I                             | I                             | I + III<br>99:1 (Rwp 17.77%)          |
|       | BIS-TRIS           | I                             | I                             | I + II + III<br>6:14:80 (Rwp 8.83%)   |
|       | CA                 | I + III<br>5:95 (Rwp 19.59%)  | I + III<br>14:86 (Rwp 13.35%) | I + III<br>90:10 (Rwp 16.96%)         |
|       | PAS                | I + III<br>50:50 (Rwp 10.05%) | I + III<br>28:72 (Rwp 8.54%)  | I + II + III<br>6:63:31 (Rwp 10.34%)  |
|       | MCC                | I + III<br>10:90 (Rwp 26.32%) | I + III<br>82:18 (Rwp 15.44%) | I + III<br>89:11 (Rwp 20.19%)         |
|       | 4COOHPhBorA        | I + III<br>94:6 (Rwp 12.86%)  | I + III<br>92:8 (Rwp 12.84%)  | I + III<br>94:6 (Rwp 14.01%)          |
|       | Na CMC             | I                             | I                             | I + III<br>97:3 (Rwp 9.75%)           |
|       | HPMC               | I + III<br>10:90 (Rwp 6.44%)  | I + III<br>36:64 (Rwp 8.36%)  | I + II + III<br>5:61:34 (Rwp 15.92%)  |

The high Rwp values are due to the additive presence or dominant orientation in the PXRD patterns.

**Table S6.** Detailed results from the crystallization experiments from highly concentrated water solutions using different additives and cooling rates with quantification results of mixtures from the Rietveld refinement.

| Additive              | Cooling Rate, °C min <sup>-1</sup> | Number of Vial                       |                                      |                                       |                                       |
|-----------------------|------------------------------------|--------------------------------------|--------------------------------------|---------------------------------------|---------------------------------------|
|                       |                                    | 1.                                   | 2.                                   | 3.                                    | 4.                                    |
| Blank (A)             | 20                                 | I + II + III<br>30:40:30 (Rwp 8.98%) | I + II + III<br>41:14:45 (Rwp 8.65%) | I + II + III<br>35:14:51 (Rwp 10.57%) | I + II + III<br>5:51:44 (Rwp 13.73%)  |
|                       | 10                                 | I + III<br>11:89 (Rwp 10.46%)        | I + III<br>5:95 (Rwp 12.58%)         | I + II<br>5:95 (Rwp 6.74%)            | II + III<br>21:79 (Rwp 10.24%)        |
|                       | 1                                  | I + III<br>17:83 (Rwp 8.70%)         | I + III<br>16:84 (Rwp 19.55%)        | I + III<br>83:17 (Rwp 6.86%)          | I                                     |
|                       | 0.1                                | III                                  | III                                  | III                                   | III                                   |
| 1% PEG (B)            | 20                                 | I + III<br>17:83 (Rwp 11.42%)        | I + III<br>12:83 (Rwp 12.70%)        | I + III<br>15:85 (Rwp 14.43%)         | III                                   |
|                       | 10                                 | I + III<br>9:91 (Rwp 16.63%)         | I + III<br>27:73 (Rwp 8.55%)         | I + III<br>86:14 (Rwp 9.16%)          | I                                     |
|                       | 1                                  | I + III<br>93:7 (Rwp 23.86%)         | I + III<br>5:95 (Rwp 14.98%)         | III                                   | III                                   |
|                       | 0.1                                | I + III<br>6:94 (Rwp 13.99%)         | I                                    | I                                     | I                                     |
| 0.5% 2,6Me-OPheBA (C) | 20                                 | I + III<br>35:65 (Rwp 11.55%)        | I + III<br>5:95 (Rwp 15.61%)         | I + III<br>29:71 (Rwp 46.76%)         | I + III<br>6:94 (Rwp 15.00%)          |
|                       | 10                                 | I + III<br>15:85 (Rwp 7.13%)         | I + III<br>15:85 (Rwp 7.27%)         | I + III<br>17:83 (Rwp 11.39%)         | I + III<br>8:92 (Rwp 12.51%)          |
|                       | 1                                  | I + III<br>42:58 (Rwp 6.90%)         | I + III<br>12:88 (Rwp 11.42%)        | I + III<br>13:87 (Rwp 37.00%)         | I + III<br>65:35 (Rwp 10.95%)         |
|                       | 0.1                                | I + III<br>22:78 (Rwp 13.18%)        | I + III<br>3:97 (Rwp 8.16%)          | I + III<br>45:55 (Rwp 13.77%)         | I                                     |
| 0.1% HPC (D)          | 20                                 | III                                  | III                                  | III                                   | I + II + III<br>26:12:62 (Rwp 55.32%) |
|                       | 10                                 | I + III<br>4:96 (Rwp 21.34%)         | I + III<br>21:79 (Rwp 9.21%)         | III                                   | III                                   |
|                       | 1                                  | I + III<br>2:98 (Rwp 11.08%)         | I + III<br>5:95 (Rwp 18.10%)         | I                                     | I + II + III<br>1:90:9 (Rwp 12.88%)   |
|                       | 0.1                                | I + III<br>3:96 (Rwp 8.84%)          | I + III<br>42:58 (Rwp 8.68%)         | I                                     | III                                   |
| 0.5% HPC (E)          | 20                                 | III                                  | III                                  | I                                     | I                                     |
|                       | 10                                 | III                                  | III                                  | III                                   | III                                   |
|                       | 1                                  | III                                  | III                                  | III                                   | III                                   |
|                       | 0.1                                | III                                  | III                                  | III                                   | I                                     |

The high Rwp values are due to the dominant orientation in the PXRD patterns.

**Table S7.** Detailed results from the crystallization experiments with different amounts and cooling rates with quantification results of mixtures from the Rietveld refinement.

| Cooling Rate, °C min <sup>-1</sup> | Additive | Number of Vial                |                               |                               |                               |
|------------------------------------|----------|-------------------------------|-------------------------------|-------------------------------|-------------------------------|
|                                    |          | 1.                            | 2.                            | 3.                            | 4.                            |
| 20                                 | Blank    | I + III<br>68:32 (Rwp 48.69%) | I + III<br>48:52 (Rwp 43.14%) | I + III<br>57:43 (Rwp 51.42%) | I                             |
|                                    | 0.5% PEG | I + III<br>6:94 (Rwp 25.14%)  | III                           | III                           | I                             |
|                                    | 0.7% PEG | III                           | III                           | III                           | III                           |
|                                    | 1% PEG   | III                           | III                           | I                             | I                             |
|                                    | 1.5% PEG | III                           | III                           | I                             | I                             |
|                                    | 2% PEG   | I + III<br>3:97 (Rwp 12.70%)  | I + III<br>54:46 (Rwp 23.85%) | III                           | III                           |
| 1                                  | Blank    | I                             | I                             | I                             | I                             |
|                                    | 0.5% PEG | I + III<br>4:96 (Rwp 11.91%)  | I + III<br>60:40 (Rwp 10.79%) | I                             | I                             |
|                                    | 0.7% PEG | I + III<br>95:5 (Rwp 12.19%)  | I + III<br>99:1 (Rwp 11.26%)  | I                             | I                             |
|                                    | 1% PEG   | I + III<br>1:99 (Rwp 12.31%)  | I + III<br>3:97 (Rwp 11.86%)  | I                             | III                           |
|                                    | 1.5% PEG | I + III<br>97:3 (Rwp 16.10%)  | I + III<br>96:4 (Rwp 10.26%)  | I                             | I                             |
|                                    | 2% PEG   | I                             | I                             | I                             | I + III<br>90:10 (Rwp 11.14%) |
| 20                                 | Blank    | I + III<br>36:64 (Rwp 44.89%) | I + III<br>88:12 (Rwp 15.55%) | I                             | I                             |
|                                    | 0.5% HPC | I                             | I                             | III                           | III                           |
|                                    | 0.7% HPC | III                           | III                           | I + III<br>32:68 (Rwp 54.17%) | I + III<br>78:22 (Rwp 25.34%) |
|                                    | 1% HPC   | III                           | III                           | III                           | I + III<br>20:80 (Rwp 7.95%)  |
|                                    | 1.5% HPC | I                             | I                             | I + III<br>97:3 (Rwp 12.82%)  | III                           |
|                                    | 2% HPC   | III                           | III                           | III                           | I + III<br>40:60 (Rwp 26.75%) |
| 10                                 | Blank    | I                             | I                             | I                             | I                             |
|                                    | 0.5% HPC | III                           | III                           | III                           | III                           |
|                                    | 0.7% HPC | I                             | I                             | I + III<br>6:94 (Rwp 6.80%)   | III                           |
|                                    | 1% HPC   | I                             | I                             | I                             | III                           |
|                                    | 1.5% HPC | III                           | III                           | I                             | I + III<br>74:26 (Rwp 5.84%)  |
|                                    | 2% HPC   | I                             | I                             | I + III<br>7:93 (Rwp 10.94%)  | III                           |

The high Rwp values are due to the dominant orientation in the PXRD patterns.

**Table S8.** Experimental solubility data for form I in 1% PEG water solution and coefficients a and b from Equation 1 found in the fitting using the least-squares approach.

| $T_{\text{exp}}$ | $S_{\text{exp}}$ | $\ln S_{\text{exp}}$ | $1/T_{\text{exp}}$ |
|------------------|------------------|----------------------|--------------------|
| 20.3             | 3.3              | 1.19                 | 0.00341            |
| 27.3             | 4.0              | 1.37                 | 0.00333            |
| 37.7             | 5.9              | 1.78                 | 0.00322            |
| 37.5             | 6.3              | 1.84                 | 0.00322            |
| 48.6             | 8.3              | 2.11                 | 0.00311            |
| 52.4             | 10.2             | 2.33                 | 0.00307            |
| 60.0             | 14.0             | 2.64                 | 0.00300            |
| 65.6             | 18.2             | 2.90                 | 0.00295            |
| 69.5             | 22.1             | 3.10                 | 0.00292            |
| 73.6             | 23.6             | 3.16                 | 0.00289            |
| a                |                  |                      | $-3910 \pm 150$    |
| b                |                  |                      | $14 \pm 0.5$       |
| $R^2$            |                  |                      | 0.9885             |
| $SE_{\ln S}$     |                  |                      | 0.08               |

**Table S9.** Experimental solubility data for form III in 1% PEG water solution and coefficients a and b from Equation 1 found in the fitting using the least-squares approach.

| $T_{\text{exp}}$ | $S_{\text{exp}}$ | $\ln S_{\text{exp}}$ | $1/T_{\text{exp}}$ |
|------------------|------------------|----------------------|--------------------|
| 17.8             | 4.3              | 1.45                 | 0.00344            |
| 27.0             | 6.1              | 1.80                 | 0.00333            |
| 32.0             | 6.3              | 1.84                 | 0.00328            |
| 44.2             | 7.8              | 2.06                 | 0.00315            |
| 50.8             | 10.3             | 2.33                 | 0.00309            |
| 58.2             | 14.3             | 2.66                 | 0.00302            |
| 67.2             | 18.2             | 2.90                 | 0.00294            |
| 70.1             | 21.4             | 3.06                 | 0.00291            |
| 72.3             | 23.3             | 3.15                 | 0.00290            |
| 74.9             | 26.9             | 3.29                 | 0.00287            |
| a                |                  |                      | $-3180 \pm 200$    |
| b                |                  |                      | $12 \pm 0.6$       |
| $R^2$            |                  |                      | 0.9698             |
| $SE_{\ln S}$     |                  |                      | 0.11               |
